# Supplementary material
Source: MDPI journal article supplement (https://www.mdpi.com/2073-4395/13/7/1929)

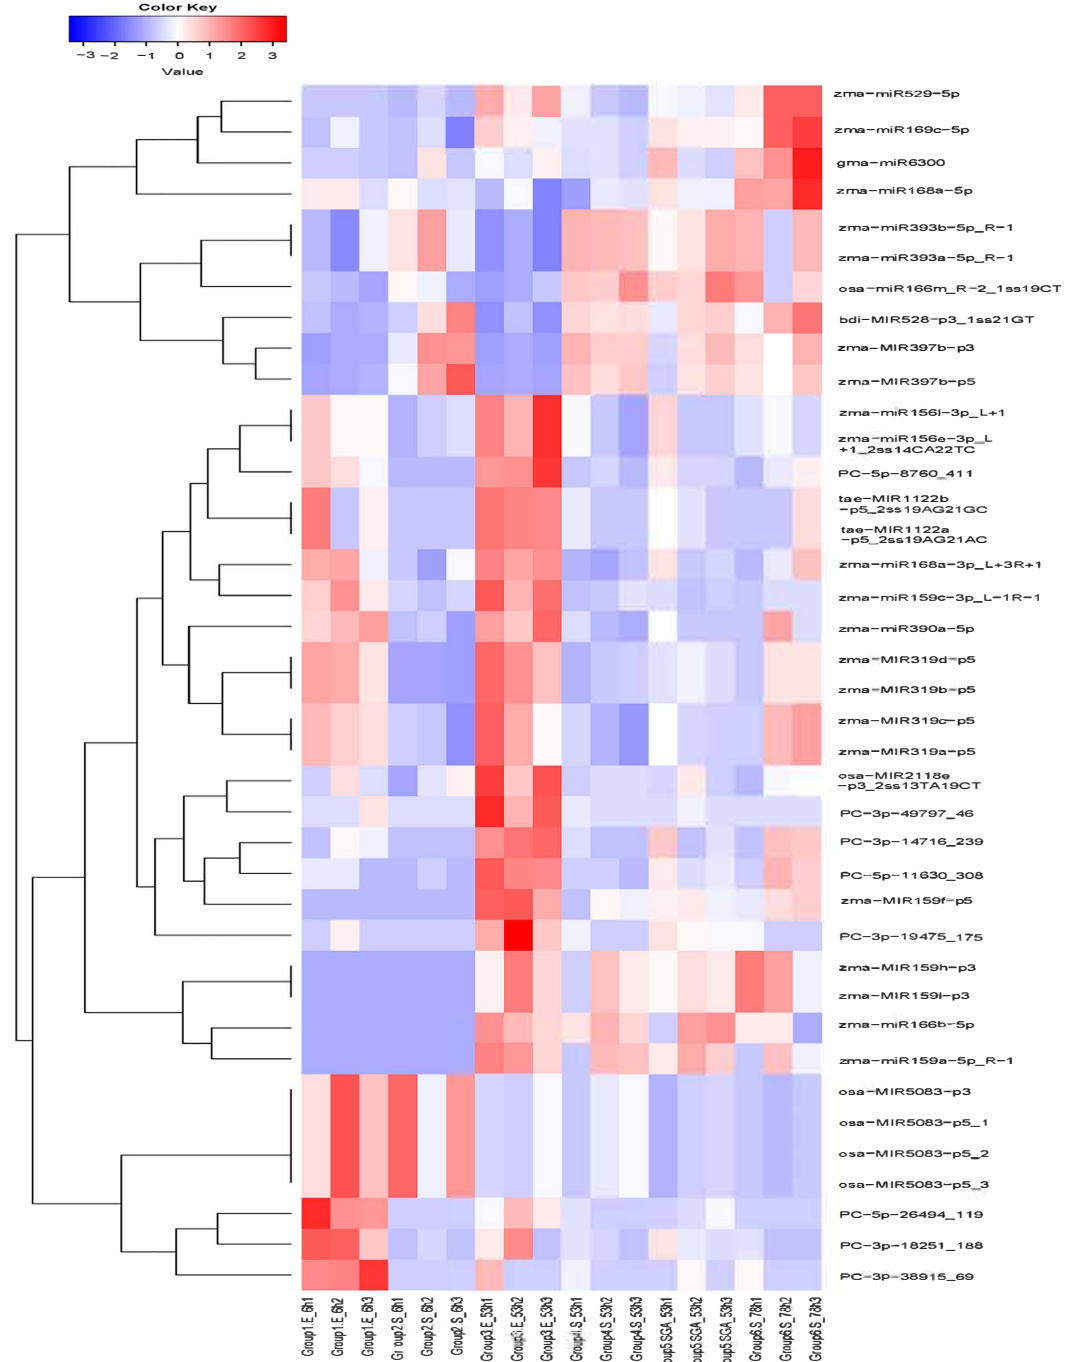

Supplemental Figure S3 Differentially expressed of partial miRNAs among different samples

Supplement: s1 [file s1]

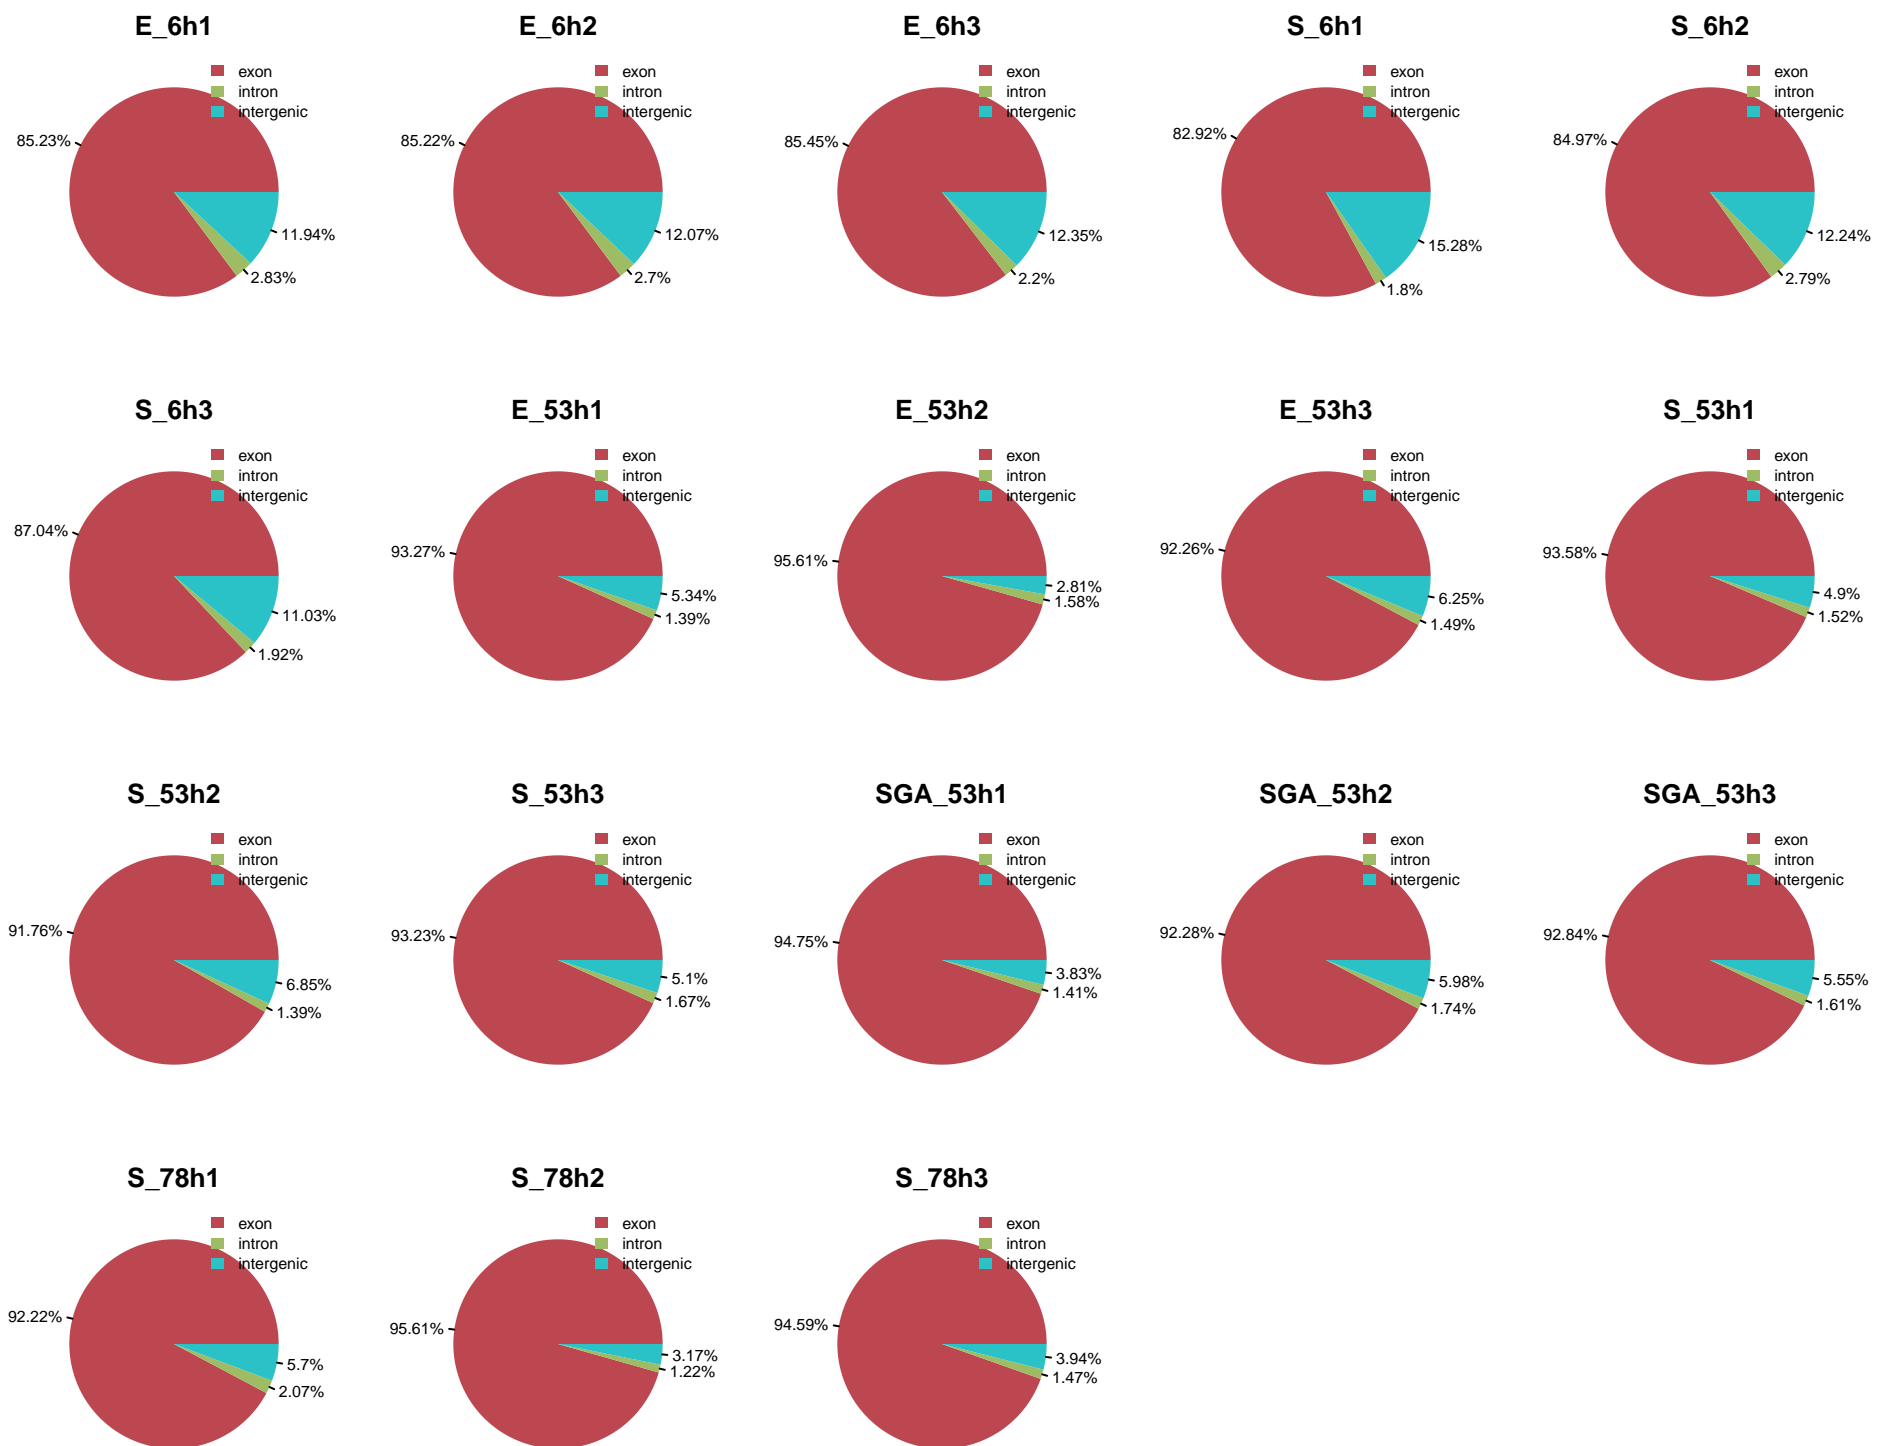

Supplemental Figure S1 Distribution regions of mapped reads in each sample

Supplement: s1 [file s1]

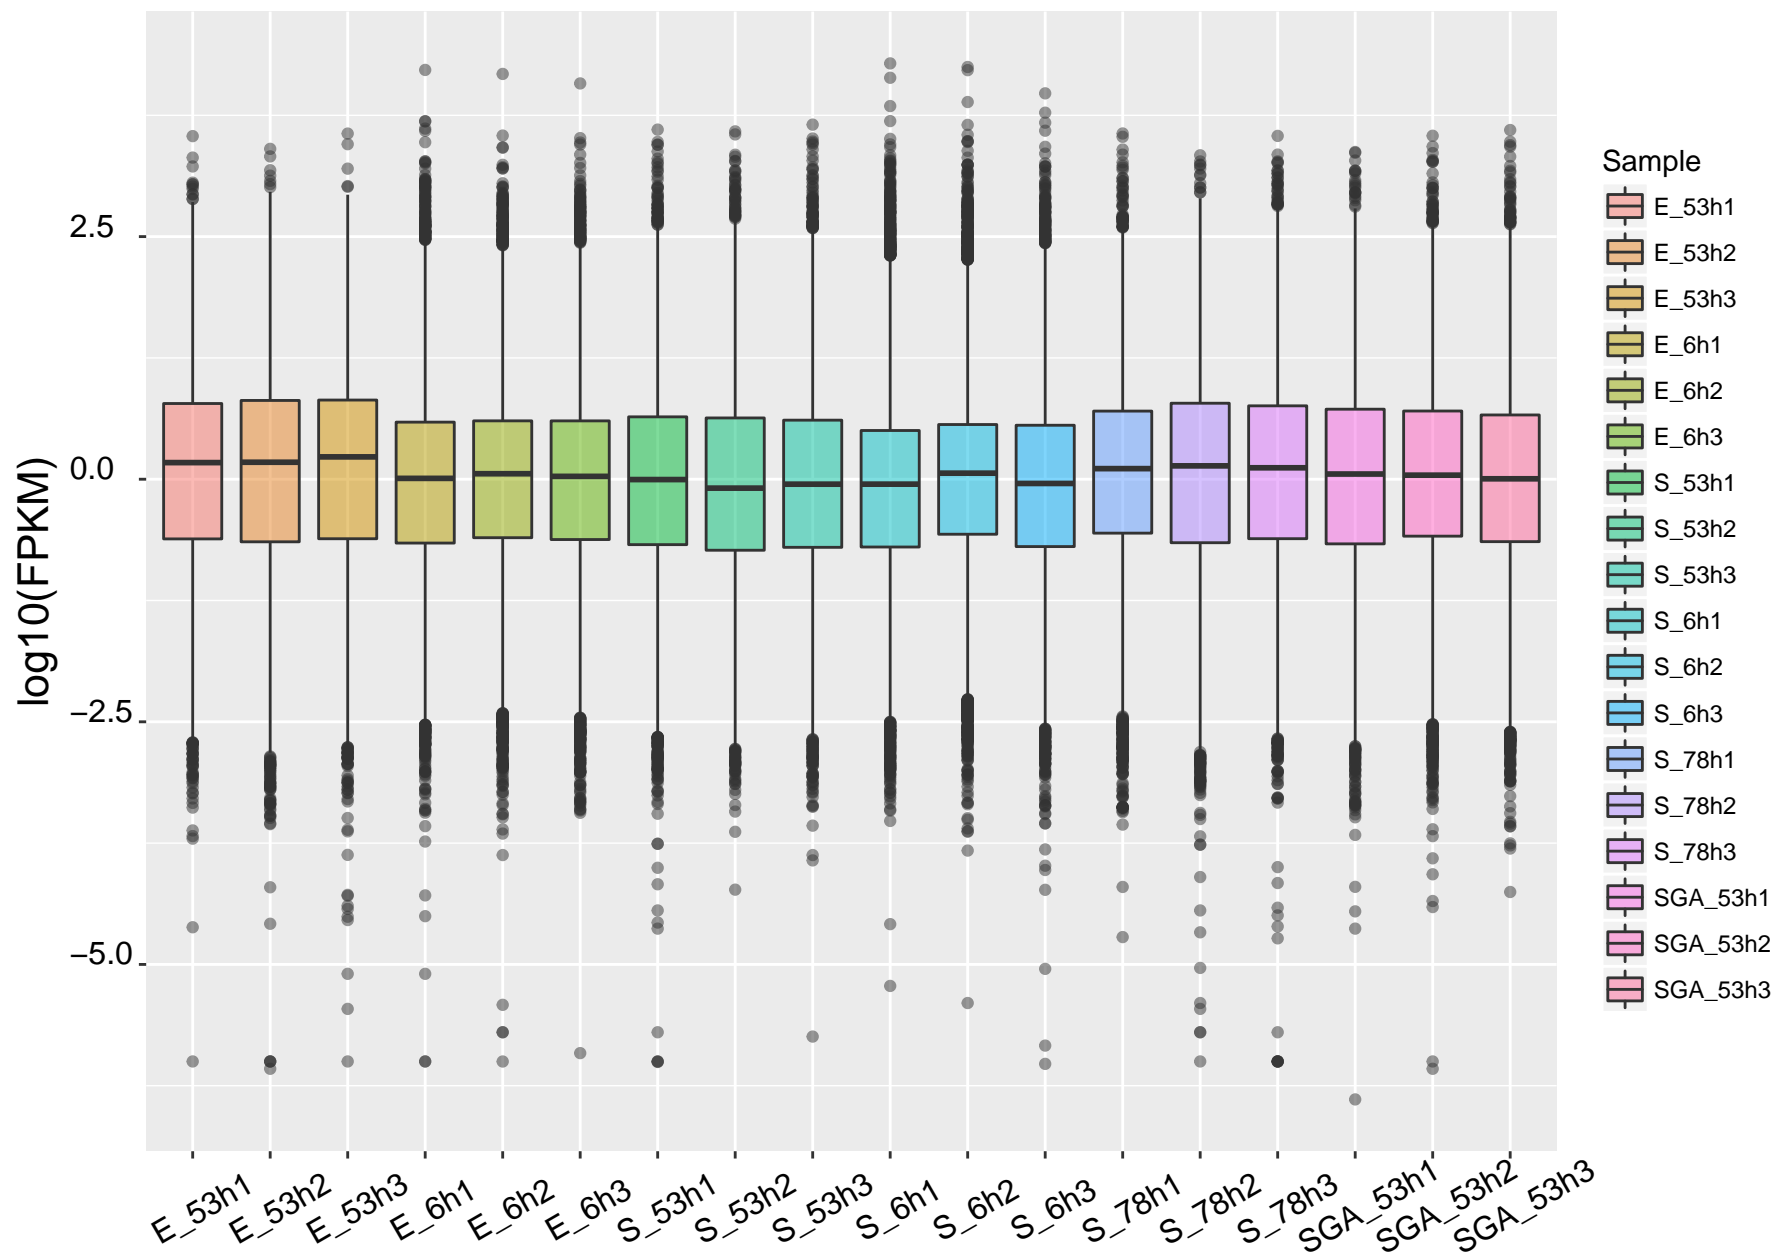

Supplemental Figure S2 Expression Profiles of genes obtained in each sample

Supplement: s1 [file s1]
